# Supplementary material for: High resolution IgH repertoire analysis reveals fetal liver as the likely origin of life-long, innate B lymphopoiesis in humans
Source: PubMed Central journal article supplement (PMC5678457; doi:10.1016/j.clim.2017.06.005), 2017-10
Supplement: mmc1.pdf [file mmc1.pdf]

**Supplementary Table 1. Samples studied and their NGS output**

|    | sample       | gestation age | No of cells | total reads count | unique clonotypes | productive clonotypes per replicate | productive clonotypes per sample |
|----|--------------|---------------|-------------|-------------------|-------------------|-------------------------------------|----------------------------------|
| 1  | FL56-rep1    | 16wks         | 3000        | 13870             | 6643              | 5243                                | 7854                             |
| 2  | FL56-rep2    | 16wks         | 3000        | 8088              | 5244              | 4011                                |                                  |
| 3  | FL66-rep1    | 14wks         | 3000        | 12551             | 2066              | 1275                                | 1882                             |
| 4  | FL66-rep2    | 14wks         | 3000        | 7956              | 1778              | 1032                                |                                  |
| 5  | FL76-rep1    | 18wks         | 3000        | 13492             | 7088              | 5626                                | 8588                             |
| 6  | FL76-rep2    | 18wks         | 3000        | 8181              | 5635              | 4408                                |                                  |
| 7  | FL86-rep1    | 14wks         | 3000        | 15046             | 6200              | 4753                                | 7045                             |
| 8  | FL86-rep2    | 14wks         | 3000        | 8783              | 4882              | 3653                                |                                  |
| 9  | FL36         | 16wks         | 500         | 16023             | 2080              | 1291                                | 1291                             |
| 10 | FBM77        | 17wks         | 1500        | 9047              | 6988              | 5673                                | 5673                             |
| 11 | FBM87        | 19wks         | 1500        | 8908              | 7212              | 5886                                | 5886                             |
| 12 | FBM97        | 13wks         | 3000        | 9271              | 5749              | 4626                                | 4626                             |
| 13 | cPB97        | 4mo           | 4000        | 15442             | 7060              | 5703                                | 5703                             |
| 14 | cPB77        | 4yrs          | 4000        | 16694             | 7983              | 6526                                | 6526                             |
| 15 | cPB87        | 4yrs          | 4000        | 18690             | 4374              | 3193                                | 3193                             |
| 16 | aPB37        | 29yrs         | 4000        | 9645              | 6144              | 5006                                | 5006                             |
| 17 | aPB47        | 43yrs         | 4000        | 10134             | 7672              | 6451                                | 6451                             |
| 18 | aPB57        | 40yrs         | 4000        | 9364              | 6401              | 5234                                | 5234                             |
| 19 | aPB67        | 38yrs         | 4000        | 8824              | 4623              | 5703                                | 5703                             |
| 20 | aPB66        | 53yrs         | 4000        | 19632             | 11753             | 9577                                | 9577                             |
|    | <b>Total</b> |               |             | <b>239641</b>     | <b>117575</b>     | <b>94870</b>                        | <b>90238</b>                     |

**Supplementary Table 2. Significance of frequency variability usage of VH genes amongst unique clonotypes according to developmental stage**

|            | aPB vs. cPB | aPB vs. FBM | aPB vs. FL | cPB vs. FBM | cPB vs. FL | FBM vs. FL |
|------------|-------------|-------------|------------|-------------|------------|------------|
| IGHV4-34   | **          | ns          | ns         | ns          | ***        | *          |
| IGHV2-70   | ****        | ns          | **         | ****        | ****       | *          |
| IGHV1-8    | ns          | ns          | **         | ns          | ns         | **         |
| IGHV4-59   | ***         | ns          | ****       | *           | ns         | **         |
| IGHV3-7    | ***         | ns          | ****       | ns          | ns         | **         |
| IGHV3-48   | ns          | ns          | ns         | *           | ns         | **         |
| IGHV1-2    | ****        | ****        | *          | ****        | **         | ****       |
| IGHV1-69   | ns          | ****        | ****       | ****        | ****       | ****       |
| IGHV5-51   | ****        | ****        | ****       | ****        | ns         | ****       |
| IGHV6-1    | ****        | ****        | ****       | ****        | ****       | ****       |
| IGHV2-5    | ****        | ns          | ****       | ****        | ****       | ****       |
| IGHV3-23   | ns          | ****        | ns         | ****        | ns         | ****       |
| IGHV3-33   | ns          | ns          | ****       | ns          | ****       | ****       |
| IGHV3-21   | *           | ***         | ****       | ns          | ****       | ****       |
| IGHV5-10-1 | ***         | ns          | ****       | ****        | ns         | ****       |
| IGHV1-3    | ns          | ns          | ****       | ns          | **         | ****       |
| IGHV3-30-3 | ns          | ns          | ****       | ns          | ****       | ****       |
| IGHV3-11   | ns          | ns          | ****       | ns          | ****       | ****       |
| IGHV4-39   | ns          | ns          | ns         | ns          | ns         | ns         |
| IGHV1-18   | ns          | ****        | ****       | ****        | ****       | ns         |
| IGHV1-46   | ns          | ****        | ****       | ****        | ****       | ns         |
| IGHV4-61   | ***         | ns          | ns         | ****        | ***        | ns         |
| IGHV3-9    | ns          | ns          | ns         | ns          | ns         | ns         |
| IGHV4-31   | ***         | ns          | ns         | ns          | *          | ns         |
| IGHV3-30   | ns          | ns          | ns         | ns          | *          | ns         |

\*p<0.05; \*\*p<0.01; \*\*\*p<0.001; \*\*\*\*p<0.0001

**Supplementary Table 3. Frequency of clonotypes with convergent recombination in FL duplicate libraries**

|                          | <b>FL56-1</b> | <b>FL56-2</b> | <b>FL66-1</b> | <b>FL66-2</b> | <b>FL76-1</b> | <b>FL76-2</b> | <b>FL86-1</b> | <b>FL86-2</b> |
|--------------------------|---------------|---------------|---------------|---------------|---------------|---------------|---------------|---------------|
| unique clnt              | 4011          | 5243          | 1032          | 1275          | 4408          | 5626          | 3653          | 4753          |
| unique convergent clnt   | 153           | 153           | 96            | 96            | 107           | 107           | 185           | 185           |
| % unique convergent clnt | 3.8           | 3             | 9.3           | 7.5           | 2.4           | 1.9           | 5             | 3.9           |



Supplementary Table 5. Representative examples of convergent recombination between duplicate FL libraries

Arbitrarily selected examples of pairs of clonotypes showing evidence of convergent evolution from Suppl Table 4 (coloured the same) were analysed with IMG2/V-QUEST.

The full VH alignments of the two assigned VH genes and alleles are shown for either clonotype (#1 and #2).

| FL-56-1 FL-56-2 |              |            |             |             |           |         |          |     |     |
|-----------------|--------------|------------|-------------|-------------|-----------|---------|----------|-----|-----|
| FL-56-1         | Junction     | VH         | DH          | JH          | FL-56-1   | FL-56-2 | Junction |     |     |
| 11              | FL-56-1      | CANVYVYDWM | IGHV3-8*012 | IGHD1-2*012 | IGHJ3*03F | 0.7961  | 0.72     | 147 | 147 |
| 12              | FL-56-2      | CANVYVYDWM | IGHV1-1*02F | IGHD1-2*012 | IGHJ3*03F | 0.1961  | 0.1241   | 147 | 147 |
|                 | IMG2/V-QUEST | #1         |             |             |           |         |          |     |     |
|                 |              | R1         |             |             |           |         |          |     |     |
|                 |              | R2         |             |             |           |         |          |     |     |
|                 |              | R3         |             |             |           |         |          |     |     |
|                 |              | R4         |             |             |           |         |          |     |     |
|                 |              | R5         |             |             |           |         |          |     |     |
|                 |              | R6         |             |             |           |         |          |     |     |
|                 |              | R7         |             |             |           |         |          |     |     |
|                 |              | R8         |             |             |           |         |          |     |     |
|                 |              | R9         |             |             |           |         |          |     |     |
|                 |              | R10        |             |             |           |         |          |     |     |
|                 |              | R11        |             |             |           |         |          |     |     |
|                 |              | R12        |             |             |           |         |          |     |     |
|                 |              | R13        |             |             |           |         |          |     |     |
|                 |              | R14        |             |             |           |         |          |     |     |
|                 |              | R15        |             |             |           |         |          |     |     |
|                 |              | R16        |             |             |           |         |          |     |     |
|                 |              | R17        |             |             |           |         |          |     |     |
|                 |              | R18        |             |             |           |         |          |     |     |
|                 |              | R19        |             |             |           |         |          |     |     |
|                 |              | R20        |             |             |           |         |          |     |     |
|                 |              | R21        |             |             |           |         |          |     |     |
|                 |              | R22        |             |             |           |         |          |     |     |
|                 |              | R23        |             |             |           |         |          |     |     |
|                 |              | R24        |             |             |           |         |          |     |     |
|                 |              | R25        |             |             |           |         |          |     |     |
|                 |              | R26        |             |             |           |         |          |     |     |
|                 |              | R27        |             |             |           |         |          |     |     |
|                 |              | R28        |             |             |           |         |          |     |     |
|                 |              | R29        |             |             |           |         |          |     |     |
|                 |              | R30        |             |             |           |         |          |     |     |
|                 |              | R31        |             |             |           |         |          |     |     |
|                 |              | R32        |             |             |           |         |          |     |     |
|                 |              | R33        |             |             |           |         |          |     |     |
|                 |              | R34        |             |             |           |         |          |     |     |
|                 |              | R35        |             |             |           |         |          |     |     |
|                 |              | R36        |             |             |           |         |          |     |     |
|                 |              | R37        |             |             |           |         |          |     |     |
|                 |              | R38        |             |             |           |         |          |     |     |
|                 |              | R39        |             |             |           |         |          |     |     |
|                 |              | R40        |             |             |           |         |          |     |     |
|                 |              | R41        |             |             |           |         |          |     |     |
|                 |              | R42        |             |             |           |         |          |     |     |
|                 |              | R43        |             |             |           |         |          |     |     |
|                 |              | R44        |             |             |           |         |          |     |     |
|                 |              | R45        |             |             |           |         |          |     |     |
|                 |              | R46        |             |             |           |         |          |     |     |
|                 |              | R47        |             |             |           |         |          |     |     |
|                 |              | R48        |             |             |           |         |          |     |     |
|                 |              | R49        |             |             |           |         |          |     |     |
|                 |              | R50        |             |             |           |         |          |     |     |
|                 |              | R51        |             |             |           |         |          |     |     |
|                 |              | R52        |             |             |           |         |          |     |     |
|                 |              | R53        |             |             |           |         |          |     |     |
|                 |              | R54        |             |             |           |         |          |     |     |
|                 |              | R55        |             |             |           |         |          |     |     |
|                 |              | R56        |             |             |           |         |          |     |     |
|                 |              | R57        |             |             |           |         |          |     |     |
|                 |              | R58        |             |             |           |         |          |     |     |
|                 |              | R59        |             |             |           |         |          |     |     |
|                 |              | R60        |             |             |           |         |          |     |     |
|                 |              | R61        |             |             |           |         |          |     |     |
|                 |              | R62        |             |             |           |         |          |     |     |
|                 |              | R63        |             |             |           |         |          |     |     |
|                 |              | R64        |             |             |           |         |          |     |     |
|                 |              | R65        |             |             |           |         |          |     |     |
|                 |              | R66        |             |             |           |         |          |     |     |
|                 |              | R67        |             |             |           |         |          |     |     |
|                 |              | R68        |             |             |           |         |          |     |     |
|                 |              | R69        |             |             |           |         |          |     |     |
|                 |              | R70        |             |             |           |         |          |     |     |
|                 |              | R71        |             |             |           |         |          |     |     |
|                 |              | R72        |             |             |           |         |          |     |     |
|                 |              | R73        |             |             |           |         |          |     |     |
|                 |              | R74        |             |             |           |         |          |     |     |
|                 |              | R75        |             |             |           |         |          |     |     |
|                 |              | R76        |             |             |           |         |          |     |     |
|                 |              | R77        |             |             |           |         |          |     |     |
|                 |              | R78        |             |             |           |         |          |     |     |
|                 |              | R79        |             |             |           |         |          |     |     |
|                 |              | R80        |             |             |           |         |          |     |     |
|                 |              | R81        |             |             |           |         |          |     |     |
|                 |              | R82        |             |             |           |         |          |     |     |
|                 |              | R83        |             |             |           |         |          |     |     |
|                 |              | R84        |             |             |           |         |          |     |     |
|                 |              | R85        |             |             |           |         |          |     |     |
|                 |              | R86        |             |             |           |         |          |     |     |
|                 |              | R87        |             |             |           |         |          |     |     |
|                 |              | R88        |             |             |           |         |          |     |     |
|                 |              | R89        |             |             |           |         |          |     |     |
|                 |              | R90        |             |             |           |         |          |     |     |
|                 |              | R91        |             |             |           |         |          |     |     |
|                 |              | R92        |             |             |           |         |          |     |     |
|                 |              | R93        |             |             |           |         |          |     |     |
|                 |              | R94        |             |             |           |         |          |     |     |
|                 |              | R95        |             |             |           |         |          |     |     |
|                 |              | R96        |             |             |           |         |          |     |     |
|                 |              | R97        |             |             |           |         |          |     |     |
|                 |              | R98        |             |             |           |         |          |     |     |
|                 |              | R99        |             |             |           |         |          |     |     |
|                 |              | R100       |             |             |           |         |          |     |     |
|                 |              | R101       |             |             |           |         |          |     |     |
|                 |              | R102       |             |             |           |         |          |     |     |
|                 |              | R103       |             |             |           |         |          |     |     |
|                 |              | R104       |             |             |           |         |          |     |     |
|                 |              | R105       |             |             |           |         |          |     |     |
|                 |              | R106       |             |             |           |         |          |     |     |
|                 |              | R107       |             |             |           |         |          |     |     |
|                 |              | R108       |             |             |           |         |          |     |     |
|                 |              | R109       |             |             |           |         |          |     |     |
|                 |              | R110       |             |             |           |         |          |     |     |
|                 |              | R111       |             |             |           |         |          |     |     |
|                 |              | R112       |             |             |           |         |          |     |     |
|                 |              | R113       |             |             |           |         |          |     |     |
|                 |              | R114       |             |             |           |         |          |     |     |
|                 |              | R115       |             |             |           |         |          |     |     |
|                 |              | R116       |             |             |           |         |          |     |     |
|                 |              | R117       |             |             |           |         |          |     |     |
|                 |              | R118       |             |             |           |         |          |     |     |
|                 |              | R119       |             |             |           |         |          |     |     |
|                 |              | R120       |             |             |           |         |          |     |     |
|                 |              | R121       |             |             |           |         |          |     |     |
|                 |              | R122       |             |             |           |         |          |     |     |
|                 |              | R123       |             |             |           |         |          |     |     |
|                 |              | R124       |             |             |           |         |          |     |     |
|                 |              | R125       |             |             |           |         |          |     |     |
|                 |              | R126       |             |             |           |         |          |     |     |
|                 |              | R127       |             |             |           |         |          |     |     |
|                 |              | R128       |             |             |           |         |          |     |     |
|                 |              | R129       |             |             |           |         |          |     |     |
|                 |              | R130       |             |             |           |         |          |     |     |
|                 |              | R131       |             |             |           |         |          |     |     |
|                 |              | R132       |             |             |           |         |          |     |     |
|                 |              | R133       |             |             |           |         |          |     |     |
|                 |              | R134       |             |             |           |         |          |     |     |
|                 |              | R135       |             |             |           |         |          |     |     |
|                 |              | R136       |             |             |           |         |          |     |     |
|                 |              | R137       |             |             |           |         |          |     |     |
|                 |              | R138       |             |             |           |         |          |     |     |
|                 |              | R139       |             |             |           |         |          |     |     |
|                 |              | R140       |             |             |           |         |          |     |     |
|                 |              | R141       |             |             |           |         |          |     |     |
|                 |              | R142       |             |             |           |         |          |     |     |
|                 |              | R143       |             |             |           |         |          |     |     |
|                 |              | R144       |             |             |           |         |          |     |     |
|                 |              | R145       |             |             |           |         |          |     |     |
|                 |              | R146       |             |             |           |         |          |     |     |
|                 |              | R147       |             |             |           |         |          |     |     |
|                 |              | R148       |             |             |           |         |          |     |     |
|                 |              | R149       |             |             |           |         |          |     |     |
|                 |              | R150       |             |             |           |         |          |     |     |
|                 |              | R151       |             |             |           |         |          |     |     |
|                 |              | R152       |             |             |           |         |          |     |     |
|                 |              | R153       |             |             |           |         |          |     |     |
|                 |              | R154       |             |             |           |         |          |     |     |
|                 |              | R155       |             |             |           |         |          |     |     |
|                 |              | R156       |             |             |           |         |          |     |     |
|                 |              | R157       |             |             |           |         |          |     |     |
|                 |              | R158       |             |             |           |         |          |     |     |
|                 |              | R159       |             |             |           |         |          |     |     |
|                 |              | R160       |             |             |           |         |          |     |     |
|                 |              | R161       |             |             |           |         |          |     |     |
|                 |              | R162       |             |             |           |         |          |     |     |
|                 |              | R163       |             |             |           |         |          |     |     |
|                 |              | R164       |             |             |           |         |          |     |     |
|                 |              | R165       |             |             |           |         |          |     |     |
|                 |              | R166       |             |             |           |         |          |     |     |
|                 |              | R167       |             |             |           |         |          |     |     |
|                 |              | R168       |             |             |           |         |          |     |     |
|                 |              | R169       |             |             |           |         |          |     |     |
|                 |              | R170       |             |             |           |         |          |     |     |
|                 |              | R171       |             |             |           |         |          |     |     |
|                 |              | R172       |             |             |           |         |          |     |     |
|                 |              | R173       |             |             |           |         |          |     |     |
|                 |              | R174       |             |             |           |         |          |     |     |
|                 |              | R175       |             |             |           |         |          |     |     |
|                 |              | R176       |             |             |           |         |          |     |     |
|                 |              | R177       |             |             |           |         |          |     |     |
|                 |              | R178       |             |             |           |         |          |     |     |
|                 |              | R179       |             |             |           |         |          |     |     |
|                 |              | R180       |             |             |           |         |          |     |     |
|                 |              | R181       |             |             |           |         |          |     |     |
|                 |              | R182       |             |             |           |         |          |     |     |
|                 |              | R183       |             |             |           |         |          |     |     |
|                 |              | R184       |             |             |           |         |          |     |     |
|                 |              | R185       |             |             |           |         |          |     |     |
|                 |              | R186       |             |             |           |         |          |     |     |
|                 |              | R187       |             |             |           |         |          |     |     |
|                 |              | R188       |             |             |           |         |          |     |     |
|                 |              | R189       |             |             |           |         |          |     |     |
|                 |              | R190       |             |             |           |         |          |     |     |
|                 |              | R191       |             |             |           |         |          |     |     |
|                 |              | R192       |             |             |           |         |          |     |     |
|                 |              | R193       |             |             |           |         |          |     |     |
|                 |              | R194       |             |             |           |         |          |     |     |

**Supplementary Table 6. Immunogenetic features of shared clonotypes between FL and FBM**

| junction                     | VH                                       | DH             | JH        | CDR3L | #  | FL, %         | FBM, %        |
|------------------------------|------------------------------------------|----------------|-----------|-------|----|---------------|---------------|
| CARISGDAFDIW                 | IGHV2-70*01F                             | IGHD3-10*01F   | IGHJ3*02F | 12    | 1  | 0.0674        | 0.0223        |
| CARGYSGGSCYYFDYW             | IGHV6-1*01F=IGHV6-1*02F                  | IGHD2-15*01F   | IGHJ4*02F | 17    | 2  | 0.0524        | 0.0111        |
| CARVTGDAFDIW                 | IGHV6-1*01F=IGHV6-1*02F                  | IGHD7-27*01F   | IGHJ3*02F | 12    | 3  | 0.0504        | 0.0334        |
| CARLTGDAFDIW                 | IGHV6-1*01F=IGHV6-1*02F                  | IGHD7-27*01F   | IGHJ3*02F | 12    | 4  | 0.0399        | 0.0228        |
| CARDWYFDLW                   | IGHV3-33*01F=IGHV3-33*06F                |                | IGHJ2*01F | 10    | 5  | 0.0372        | 0.0108        |
| CARDNWGSADFIDW               | IGHV6-1*01F=IGHV6-1*02F                  | IGHD7-27*01F   | IGHJ3*02F | 13    | 6  | 0.03          | 0.0111        |
| CARDGFDYW                    | IGHV3-7*01F                              | IGHD1-26*01F   | IGHJ4*02F | 9     | 7  | 0.016         | 0.0108        |
| CAKGYSSSWYFDYW               | IGHV3-30*03F=IGHV3-30*18F=IGHV3-30-5*01F | IGHD6-13*01F   | IGHJ4*02F | 14    | 8  | 0.015         | 0.0108        |
| CARGFDYW                     | IGHV1-69*13(F)                           | IGHD1-26*01F   | IGHJ4*02F | 8     | 9  | 0.0124        | 0.0108        |
| CARGGYSYDADFIDW              | IGHV6-1*01F=IGHV6-1*02F                  | IGHD5-12*01F   | IGHJ3*02F | 16    | 10 | 0.0123        | 0.0111        |
| CAREQTGDAFDIW                | IGHV1-2*04F                              | IGHD7-27*01F   | IGHJ3*02F | 13    | 11 | 0.0099        | 0.0108        |
| CAREANSADFIDW                | IGHV1-8*01F                              | IGHD4-23*01ORF | IGHJ3*02F | 13    | 12 | 0.0099        | 0.0111        |
| CARGRTGDAFDIW                | IGHV6-1*01F=IGHV6-1*02F                  | IGHD1-1*01F    | IGHJ3*02F | 13    | 13 | 0.0075        | 0.0108        |
| CARDAFDIW                    | IGHV1-2*04F                              |                | IGHJ3*02F | 9     | 14 | 0.0075        | 0.0108        |
| CARDGFDYW                    | IGHV3-33*01F=IGHV3-33*06F                | IGHD1-26*01F   | IGHJ4*02F | 9     | 15 | 0.008         | 0.0217        |
| <b>% of total repertoire</b> |                                          |                |           |       |    | <b>0.3758</b> | <b>0.2202</b> |

**Supplementary Table 7. Immunogenetic features of shared clonotypes between FL and postnatal samples**

| junction                      | VH                        | DH             | JH        | CDR3L | #  | FL, %          | cPB, % | aPB, %        |
|-------------------------------|---------------------------|----------------|-----------|-------|----|----------------|--------|---------------|
| <b>CARAKRGYYGMDVW</b>         | IGHV5-51*01F=IGHV5-51*02F | IGHD5-24*01ORF | IGHJ6*02F | 14    | 1  | 5.6772         | 0      | 0.0257        |
| <b>CARNSGGTFDYW</b>           | IGHV6-1*01F=IGHV6-1*02F   | IGHD2-15*01F   | IGHJ4*02F | 12    | 2  | 2.7727         | 0      | 0.036         |
| <b>CVHRLSTLRGDIPYFDYW</b>     | IGHV2-5*02F               | IGHD3-16*02F   | IGHJ4*02F | 18    | 3  | 2.503          | 0      | 0.2728        |
| <b>CARHSAVGTRHGMVDVW</b>      | IGHV5-51*01F              | IGHD6-19*01F   | IGHJ6*02F | 17    | 4  | 1.5306         | 0      | 0.0154        |
| <b>CARGRHCSSTSCYFPLFDYW</b>   | IGHV4-59*01F              | IGHD2-2*01F    | IGHJ4*02F | 20    | 5  | 1.1856         | 0      | 0.0051        |
| <b>CARAHSSGMETGAFDIW</b>      | IGHV6-1*01F=IGHV6-1*02F   | IGHD6-19*01F   | IGHJ3*02F | 17    | 6  | 0.6461         | 0      | 0.0051        |
| <b>CARDGGYDWGTPRHFFDYW</b>    | IGHV1-18*01F              | IGHD5-12*01F   | IGHJ4*02F | 19    | 7  | 0.5959         | 0      | 0.0154        |
| <b>CARDYYYYGMDVW</b>          | IGHV4-59*01F              |                | IGHJ6*02F | 13    | 8  | 0.3801         | 0      | 0.012         |
| <b>CASYLNWGEDYW</b>           | IGHV3-11*03F=IGHV3-11*05F | IGHD7-27*01F   | IGHJ4*02F | 12    | 9  | 0.3387         | 0      | 0.0051        |
| <b>CARVELGISPNDAFDIW</b>      | IGHV3-7*03F               | IGHD7-27*01F   | IGHJ3*02F | 17    | 10 | 0.3011         | 0      | 0.0051        |
| <b>CVHRLSTLRGDIPYFDYW</b>     | IGHV2-70*01F              | IGHD3-16*02F   | IGHJ4*02F | 18    | 11 | 0.0376         | 0      | 0.0186        |
| <b>CVHRLSTLRGDIPYFDYW</b>     | IGHV2-5*02F               | IGHD3-10*01F   | IGHJ4*02F | 18    | 12 | 0.0314         | 0      | 0.0051        |
| <b>CARDYYYYGMDVW</b>          | IGHV4-61*01F              |                | IGHJ6*02F | 13    | 13 | 0.026          | 0      | 0.0051        |
| <b>CARRSNYASGFDYW</b>         | IGHV5-51*01F              | IGHD3-10*01F   | IGHJ4*02F | 14    | 14 | 0.0125         | 0      | 0.0114        |
| <b>CAKGYSSWYFDYW</b>          | IGHV3-9*01F               | IGHD6-13*01F   | IGHJ4*02F | 15    | 15 | 0.0067         | 0      | 0.0051        |
| <b>CVGVRTGTSCYDSW</b>         | IGHV4-31*03F=IGHV4-31*04F | IGHD2-2*01F    | IGHJ5*01F | 14    | 16 | 0.0063         | 0      | 0.2111        |
| <b>CARSSVHLAFDIW</b>          | IGHV2-5*01F               | IGHD3-10*02F   | IGHJ3*02F | 13    | 17 | 0.0063         | 0      | 0.139         |
| <b>CARDKVAGEGYFHYW</b>        | IGHV4-4*02F               | IGHD6-19*01F   | IGHJ4*02F | 15    | 18 | 0.0063         | 0      | 0.0875        |
| <b>CAKDMWTARSGENYYYYGMDVW</b> | IGHV3-23*01F=IGHV3-23*04F | IGHD3-10*02F   | IGHJ6*02F | 22    | 19 | 0.0063         | 0      | 0.0257        |
| <b>CAGSHPKIVTSLDYW</b>        | IGHV3-7*01F               | IGHD5-12*01F   | IGHJ4*02F | 16    | 20 | 0.0063         | 0      | 0.0103        |
| <b>CARHVMYHSGSYSLHWYFDLW</b>  | IGHV5-51*01F              | IGHD1-26*01F   | IGHJ2*01F | 21    | 21 | 0.0063         | 0      | 0.0051        |
| <b>CARSPVLNHDADFIDW</b>       | IGHV5-51*01F              | IGHD2-8*01F    | IGHJ3*02F | 15    | 22 | 0.2384         | 0.0785 | 0             |
| <b>% of total repertoire</b>  |                           |                |           |       |    | <b>16.3214</b> |        | <b>0.9217</b> |

Clonotypes with the same highlighted background demonstrate VDJ convergent recombination; clonotypes in bold are amongst the top 100 most abundant across all developmental stages (Fig 2b)

**Supplementary Table 8. Immunogenetic features of shared clonotypes between FBM and postnatal samples**

| junction                | VH                                     | DH             | JH        | CDR3L | #  | FBM, % | cPB, % | aPB, % |        |
|-------------------------|----------------------------------------|----------------|-----------|-------|----|--------|--------|--------|--------|
| CAHRRFLGSTGGFDYW        | IGHV2-5*02F                            | IGHD3-10*02F   | IGHJ4*02F |       | 16 | 1      | 0.1951 | 0.0065 | 0      |
| CARRNLTDGDFDYW          | IGHV5-51*01F                           | IGHD7-27*01F   | IGHJ4*02F |       | 13 | 2      | 0.1192 | 0.0065 | 0      |
| CAREVNGDAFDIW           | IGHV6-1*01F=IGHV6-1*02F                | IGHD3-16*01F   | IGHJ3*02F |       | 13 | 3      | 0.0975 | 0.0065 | 0      |
| CARGTDWYFDLW            | IGHV6-1*01F=IGHV6-1*02F                | IGHD7-27*01F   | IGHJ2*01F |       | 13 | 4      | 0.0975 | 0.0065 | 0      |
| CAHRRRRFAFDIW           | IGHV2-5*02F                            | IGHD3-3*01F    | IGHJ3*02F |       | 13 | 5      | 0.0759 | 0.0065 | 0      |
| CARDGWDYFDLW            | IGHV6-1*01F=IGHV6-1*02F                | IGHD3-10*01F   | IGHJ2*01F |       | 13 | 6      | 0.0759 | 0.0065 | 0      |
| CARGGNWPPNDAFDIW        | IGHV6-1*01F=IGHV6-1*02F                | IGHD7-27*01F   | IGHJ3*02F |       | 18 | 7      | 0.0759 | 0.0065 | 0      |
| CARTPLGKDAFDIW          | IGHV2-70*01F                           | IGHD7-27*01F   | IGHJ3*02F |       | 14 | 8      | 0.0759 | 0.0065 | 0      |
| CARFLTIFGVVIDAFDIW      | IGHV6-1*01F=IGHV6-1*02F                | IGHD3-3*01F    | IGHJ3*02F |       | 18 | 9      | 0.0683 | 0.0109 | 0      |
| CARLELLGMVEAFDIW        | IGHV5-51*01F                           | IGHD1-20*01F   | IGHJ3*02F |       | 16 | 10     | 0.0669 | 0.0121 | 0      |
| CAHRRPFLWYFDLW          | IGHV2-5*02F                            | IGHD1-14*01ORF | IGHJ2*01F |       | 14 | 11     | 0.065  | 0.0065 | 0      |
| CARSMARRGSYYFDYW        | IGHV2-70*11F                           | IGHD1-26*01F   | IGHJ4*02F |       | 16 | 12     | 0.0569 | 0.0055 | 0      |
| CARGVAGDAFDIW           | IGHV6-1*01F=IGHV6-1*02F                | IGHD2-15*01F   | IGHJ3*02F |       | 13 | 13     | 0.0557 | 0.006  | 0      |
| CAREGGSIIIDYW           | IGHV6-1*01F=IGHV6-1*02F                | IGHD4-23*01ORF | IGHJ4*02F |       | 13 | 14     | 0.0455 | 0.0055 | 0      |
| CAREVTGDRPGYFDYW        | IGHV6-1*01F=IGHV6-1*02F                | IGHD7-27*01F   | IGHJ4*02F |       | 16 | 15     | 0.0455 | 0.0055 | 0      |
| CAHENLTGVVYW            | IGHV2-5*02F                            | IGHD7-27*01F   | IGHJ4*02F |       | 12 | 16     | 0.0446 | 0.006  | 0      |
| CARHVGDIW               | IGHV5-51*01F                           | IGHD1-26*01F   | IGHJ3*02F |       | 9  | 17     | 0.0446 | 0.006  | 0      |
| CAREGIAAAGLLDYW         | IGHV6-1*01F=IGHV6-1*02F                | IGHD6-13*01F   | IGHJ4*02F |       | 15 | 18     | 0.0341 | 0.0109 | 0      |
| CARGSAMSGSDIW           | IGHV6-1*01F=IGHV6-1*02F                | IGHD3-16*01F   | IGHJ3*02F |       | 13 | 19     | 0.0341 | 0.0109 | 0      |
| CAREGGSELDDAFDIW        | IGHV6-1*01F=IGHV6-1*02F                | IGHD3-22*01F   | IGHJ3*02F |       | 17 | 20     | 0.0325 | 0.0065 | 0      |
| CARQLLTGDDWYFDLW        | IGHV4-39*01F                           | IGHD7-27*01F   | IGHJ2*01F |       | 17 | 21     | 0.0325 | 0.0065 | 0      |
| CARGDILTGYSNWFDPW       | IGHV3-64*01F                           | IGHD3-9*01F    | IGHJ5*02F |       | 17 | 22     | 0.0228 | 0.0055 | 0      |
| CARILQSSSWYDAFDIW       | IGHV2-70*01F                           | IGHD6-13*01F   | IGHJ3*02F |       | 17 | 23     | 0.0228 | 0.0055 | 0      |
| CARSIPYRWFRELLYYFDYW    | IGHV5-51*01F                           | IGHD3-10*01F   | IGHJ4*02F |       | 20 | 24     | 0.0228 | 0.0055 | 0      |
| CAHAIRGGGAFDIW          | IGHV2-5*02F                            | IGHD3-16*01F   | IGHJ3*02F |       | 14 | 25     | 0.0223 | 0.006  | 0      |
| CAHKDDGYWYFDLW          | IGHV2-5*02F                            | IGHD3-10*01F   | IGHJ2*01F |       | 14 | 26     | 0.0223 | 0.006  | 0      |
| CARGFNWAAAFDIW          | IGHV1-2*02F                            | IGHD1-1*01F    | IGHJ3*02F |       | 14 | 27     | 0.0223 | 0.006  | 0      |
| CARPLKLYDAFDIW          | IGHV5-51*01F                           | IGHD3-10*02F   | IGHJ3*02F |       | 15 | 28     | 0.0223 | 0.006  | 0      |
| CARGTDGDDAFDIW          | IGHV3-30*01F                           | IGHD7-27*01F   | IGHJ3*02F |       | 14 | 29     | 0.0114 | 0.0109 | 0      |
| CARDLNRDAFDIW           | IGHV6-1*01F=IGHV6-1*02F                | IGHD3-9*01F    | IGHJ3*02F |       | 14 | 30     | 0.0114 | 0.0055 | 0      |
| CARDSPTGDDPLDAFDIW      | IGHV4-31*03F=IGHV4-31*04F              | IGHD7-27*01F   | IGHJ3*02F |       | 18 | 31     | 0.0114 | 0.0055 | 0      |
| CARGRSTGEDFDYW          | IGHV5-51*01F                           | IGHD7-27*01F   | IGHJ4*02F |       | 14 | 32     | 0.0114 | 0.0055 | 0      |
| CARGTWNWINDYFDYW        | IGHV3-53*01F=IGHV3-53*02F              | IGHD1-1*01F    | IGHJ4*02F |       | 18 | 33     | 0.0114 | 0.0055 | 0      |
| CARLVANWGYNWFDPW        | IGHV5-51*01F                           | IGHD7-27*01F   | IGHJ5*02F |       | 17 | 34     | 0.0114 | 0.0055 | 0      |
| CARNTGGYCSSTSCYFDLW     | IGHV5-51*01F                           | IGHD2-2*01F    | IGHJ2*01F |       | 21 | 35     | 0.0114 | 0.0055 | 0      |
| CARPGSAGDYW             | IGHV5-51*01F                           | IGHD1-1*01F    | IGHJ4*02F |       | 11 | 36     | 0.0114 | 0.0055 | 0      |
| CARRRGYSSWYAFDIW        | IGHV5-51*01F                           | IGHD6-13*01F   | IGHJ3*02F |       | 17 | 37     | 0.0114 | 0.0055 | 0      |
| CARRSAAAGIFDYW          | IGHV5-51*01F                           | IGHD6-13*01F   | IGHJ4*02F |       | 14 | 38     | 0.0114 | 0.0055 | 0      |
| CARVGITTFGVVIRGGVEFDYW  | IGHV1-69*02F=IGHV1-69*04F=IGHV1-69*09F | IGHD3-3*01F    | IGHJ4*02F |       | 23 | 39     | 0.0114 | 0.0055 | 0      |
| CAREDAFDIW              | IGHV1-2*02F                            |                | IGHJ3*02F |       | 10 | 40     | 0.0111 | 0.0483 | 0      |
| CARVRANWGYFDLW          | IGHV6-1*01F=IGHV6-1*02F                | IGHD7-27*01F   | IGHJ2*01F |       | 14 | 41     | 0.0111 | 0.0325 | 0      |
| CARARFLWLFYFDYW         | IGHV5-51*01F                           | IGHD3-3*01F    | IGHJ4*02F |       | 14 | 42     | 0.0111 | 0.006  | 0      |
| CARDGDLDPFDYW           | IGHV1-2*02F                            | IGHD3-10*01F   | IGHJ4*02F |       | 13 | 43     | 0.0111 | 0.006  | 0      |
| CARDRGRTGDRGDYFDYW      | IGHV6-1*01F=IGHV6-1*02F                | IGHD7-27*01F   | IGHJ4*02F |       | 18 | 44     | 0.0111 | 0.006  | 0      |
| CARERITIFGVVDYW         | IGHV6-1*01F=IGHV6-1*02F                | IGHD3-3*01F    | IGHJ4*02F |       | 15 | 45     | 0.0111 | 0.006  | 0      |
| CARFCEGRDWRGFDYW        | IGHV6-1*01F=IGHV6-1*02F                | IGHD3-16*01F   | IGHJ4*02F |       | 17 | 46     | 0.0111 | 0.006  | 0      |
| CARFLEWYFDYW            | IGHV1-8*01F=IGHV1-8*02F                | IGHD3-3*01F    | IGHJ4*02F |       | 12 | 47     | 0.0111 | 0.006  | 0      |
| CARGNRPLAFDIW           | IGHV6-1*01F=IGHV6-1*02F                | IGHD1-26*01F   | IGHJ3*02F |       | 13 | 48     | 0.0111 | 0.006  | 0      |
| CARGRANWGTYFDYW         | IGHV6-1*01F=IGHV6-1*02F                | IGHD7-27*01F   | IGHJ4*02F |       | 15 | 49     | 0.0111 | 0.006  | 0      |
| CARRLTGDAFDIW           | IGHV1-69*02F=IGHV1-69*04F=IGHV1-69*09F | IGHD7-27*01F   | IGHJ3*02F |       | 13 | 50     | 0.0111 | 0.006  | 0      |
| CARTRTRPLNDGVDYW        | IGHV1-2*02F                            | IGHD3-10*02F   | IGHJ4*02F |       | 17 | 51     | 0.0108 | 0.397  | 0      |
| CYDFWNSGYPVW            | IGHV1-8*01F=IGHV1-8*02F                | IGHD3-3*01F    | IGHJ4*02F |       | 12 | 52     | 0.0108 | 0.0195 | 0      |
| CARDLWYFDLW             | IGHV3-7*01F                            | IGHD5-12*01F   | IGHJ2*01F |       | 12 | 53     | 0.0108 | 0.0065 | 0      |
| CARFGDGDWYFDLW          | IGHV4-39*07F                           | IGHD3-10*01F   | IGHJ2*01F |       | 14 | 54     | 0.0108 | 0.0065 | 0      |
| CARIPRRIDAFDIW          | IGHV2-5*02F                            | IGHD3-22*01F   | IGHJ3*02F |       | 14 | 55     | 0.0108 | 0.0065 | 0      |
| CARRVAGFDYW             | IGHV4-59*08F                           | IGHD6-19*01F   | IGHJ4*02F |       | 11 | 56     | 0.0108 | 0.0065 | 0      |
| CARVLSIAARYYGMVDW       | IGHV6-1*01F=IGHV6-1*02F                | IGHD6-6*01F    | IGHJ6*02F |       | 18 | 57     | 0.0108 | 0.0065 | 0      |
| CASLGLGTEEYFDYW         | IGHV1-2*02F                            | IGHD6-13*01F   | IGHJ4*02F |       | 16 | 58     | 0.0108 | 0.0065 | 0      |
| CASRLGLGIPYWFYFDLW      | IGHV4-39*01F                           | IGHD7-27*01F   | IGHJ2*01F |       | 17 | 59     | 0.0108 | 0.0065 | 0      |
| CARYLTGTDAFDIW          | IGHV6-1*01F=IGHV6-1*02F                | IGHD1-20*01F   | IGHJ3*02F |       | 14 | 60     | 0.0557 | 0      | 0.01   |
| CAREGICDSSWYFQHW        | IGHV6-1*01F=IGHV6-1*02F                | IGHD6-13*01F   | IGHJ1*01F |       | 16 | 61     | 0.0433 | 0      | 0.0108 |
| CARGYSGSYEYFQHW         | IGHV6-1*01F=IGHV6-1*02F                | IGHD3-10*01F   | IGHJ1*01F |       | 16 | 62     | 0.0341 | 0      | 0.01   |
| CAHQELWFGELFDYW         | IGHV2-5*02F                            | IGHD3-10*01F   | IGHJ4*02F |       | 16 | 63     | 0.0334 | 0      | 0.0104 |
| CALGVVEASGGWYRSLDPW     | IGHV1-2*04F                            | IGHD2-15*01F   | IGHJ5*02F |       | 20 | 64     | 0.0223 | 0      | 0.0114 |
| CARHKEFNWFDPW           | IGHV5-51*01F                           | IGHD3-9*01F    | IGHJ5*02F |       | 13 | 65     | 0.0217 | 0      | 0.01   |
| CARMGHAFDIW             | IGHV4-31*03F=IGHV4-31*04F              | IGHD3-16*01F   | IGHJ3*02F |       | 12 | 66     | 0.0217 | 0      | 0.01   |
| CGRTYNYDTSWGFYEW        | IGHV1-46*01F=IGHV1-46*02F=IGHV1-46*03F | IGHD3-22*01F   | IGHJ4*02F |       | 17 | 67     | 0.0114 | 0      | 0.4102 |
| CARAERYDFWSGLYYFDYW     | IGHV1-8*01F=IGHV1-8*02F                | IGHD3-3*01F    | IGHJ4*02F |       | 20 | 68     | 0.0114 | 0      | 0.1823 |
| CARRRAYGNMDSGTFEIW      | IGHV2-5*02F                            | IGHD2-21*02F   | IGHJ3*02F |       | 19 | 69     | 0.0114 | 0      | 0.1506 |
| CARDSRRNELLSPGYFDLW     | IGHV1-2*02F                            | IGHD2-15*01F   | IGHJ2*01F |       | 20 | 70     | 0.0114 | 0      | 0.0114 |
| CARERRDAFDIW            | IGHV1-46*01F=IGHV1-46*02F=IGHV1-46*03F | IGHD4-23*01ORF | IGHJ3*02F |       | 12 | 71     | 0.0114 | 0      | 0.0114 |
| CARDRSSVDYW             | IGHV7-4-1*02F                          | IGHD6-6*01F    | IGHJ4*02F |       | 12 | 72     | 0.0114 | 0      | 0.0108 |
| CAHPSNGDAFDIW           | IGHV2-5*02F                            | IGHD2-8*02F    | IGHJ3*02F |       | 13 | 73     | 0.0114 | 0      | 0.01   |
| CARGWVDAFDIW            | IGHV6-1*01F=IGHV6-1*02F                | IGHD6-19*01F   | IGHJ3*02F |       | 13 | 74     | 0.0114 | 0      | 0.01   |
| CARDRWFGELGSFDYW        | IGHV6-1*01F=IGHV6-1*02F                | IGHD3-10*01F   | IGHJ4*02F |       | 16 | 75     | 0.0111 | 0      | 0.0731 |
| CARAVWGGAVDW            | IGHV6-1*01F=IGHV6-1*02F                | IGHD3-16*01F   | IGHJ4*02F |       | 12 | 76     | 0.0111 | 0      | 0.0522 |
| CAREDRDAWVAGASYYYYYMDVW | IGHV6-1*01F=IGHV6-1*02F                | IGHD3-10*02F   | IGHJ6*03F |       | 24 | 77     | 0.0111 | 0      | 0.0313 |
| CARKAGDAAGMDVW          | IGHV2-70*01F                           | IGHD7-27*01F   | IGHJ6*02F |       | 14 | 78     | 0.0111 | 0      | 0.0215 |
| CARSYSGSGWFDPW          | IGHV2-70*01F                           | IGHD3-10*01F   | IGHJ5*02F |       | 15 | 79     | 0.0111 | 0      | 0.02   |
| CARVLYCGDCSSRYYYGMDVW   | IGHV1-2*02F=IGHV1-2*05F                | IGHD2-21*01F   | IGHJ6*02F |       | 22 | 80     | 0.0111 | 0      | 0.02   |
| CAHSSITIFGVVIPYWFDPW    | IGHV2-5*01F                            | IGHD3-3*01F    | IGHJ5*02F |       | 21 | 81     | 0.0111 | 0      | 0.01   |
| CARSEVVGPSGEDFDNW       | IGHV6-1*01F=IGHV6-1*02F                | IGHD1-26*01F   | IGHJ4*02F |       | 17 | 82     | 0.0108 | 0      | 0.03   |
| CARVDYGLHAFDIW          | IGHV4-59*01F                           | IGHD3-16*01F   | IGHJ3*02F |       | 14 | 83     | 0.0108 | 0      | 0.01   |
| % total repertoire      |                                        |                |           |       |    | 2.3641 | 0.854  | 1.1374 |        |



**Supplementary Table 9. Immunogenetic features of clonotypes belonging to CLL stereotypic IgH receptors**

'confidence' is based on the difference between the assignment score for that sequence and the minimum assignment score for that subset.

| sample | CLL subset | confidence | score   | VH                                  | JH                | CDR3len | mut       | junction                  | frame    |
|--------|------------|------------|---------|-------------------------------------|-------------------|---------|-----------|---------------------------|----------|
| FL     | CLL#5      | average    | 27.5457 | IGHV7-4-1*02                        | IGHJ6*02          | 20      | unmutated | CARGGITGANSKYYYYGMDVW     | in-frame |
| FL     | CLL#5      | borderline | 22.7507 | IGHV1-69*13                         | IGHJ6*02          | 20      | unmutated | CARDHPSGDGAYYYYYGMDVW     | in-frame |
| FL     | CLL#5      | borderline | 21.5542 | IGHV1-69*13                         | IGHJ6*02          | 20      | unmutated | CARTSKDVIATIRYYYYGMDVW    | in-frame |
| FBM    | CLL#5      | average    | 28.1072 | IGHV1-69*01=IGHV1-69*12=IGHV1-69*13 | IGHJ6*03          | 20      | unmutated | CARDGVRDQTGFYYYYGMDVW     | in-frame |
| FBM    | CLL#5      | borderline | 21.7374 | IGHV1-46*01=IGHV1-46*02=IGHV1-46*03 | IGHJ6*03          | 20      | unmutated | CARVRLGPVAVGYYYYGMDVW     | in-frame |
| FBM    | CLL#5      | borderline | 22.1194 | IGHV1-2*02=IGHV1-2*03=IGHV1-2*04    | IGHJ6*02          | 20      | unmutated | CARGGREQLVRYYYYYGMDVW     | in-frame |
| FBM    | CLL#5      | high       | 35.2981 | IGHV5-51*01                         | IGHJ6*03          | 20      | unmutated | CARLTIFGVVVIDYYYYGMDVW    | in-frame |
| cPB    | CLL#5      | average    | 31.8392 | IGHV1-8*02                          | IGHJ6*03          | 20      | unmutated | CARAGRPPVVIIPYYYYGMDVW    | in-frame |
| cPB    | CLL#5      | borderline | 21.5374 | IGHV1-8*01=IGHV1-8*02               | IGHJ6*03          | 20      | unmutated | CARGNTRIFIGVVTYYYYGMDVW   | in-frame |
| cPB    | CLL#5      | borderline | 21.0583 | IGHV1-69*01=IGHV1-69*12=IGHV1-69*13 | IGHJ6*03          | 20      | unmutated | CARGAGIYAVAGTRNYYYYGMDVW  | in-frame |
| cPB    | CLL#5      | high       | 34.6449 | IGHV1-69*13                         | IGHJ6*03          | 20      | unmutated | CARDEVAVAPRHYYYYYGMDVW    | in-frame |
| cPB    | CLL#5      | low        | 23.9373 | IGHV1-18*01=IGHV1-18*04             | IGHJ6*03          | 20      | unmutated | CARDPVTVTITQDYYYYGMDVW    | in-frame |
| cPB    | CLL#5      | average    | 27.1534 | IGHV1-69*01=IGHV1-69*12=IGHV1-69*13 | IGHJ6*02          | 20      | unmutated | CARNPGIYAVPQYCYGMDVW      | in-frame |
| cPB    | CLL#5      | low        | 25.2939 | IGHV1-3*01                          | IGHJ6*02          | 20      | unmutated | CARDSVDIATWVYYYYGMDVW     | in-frame |
| cPB    | CLL#5      | low        | 23.9709 | IGHV5-10-1*01=IGHV5-10-1*03         | IGHJ6*02          | 20      | unmutated | CARQQIYAVAGTVYYYYGMDVW    | in-frame |
| cPB    | CLL#5      | low        | 23.8836 | IGHV1-69*13                         | IGHJ6*02          | 20      | unmutated | CASPTGSGSYTYYYYYGMDVW     | in-frame |
| cPB    | CLL#5      | average    | 22.7617 | IGHV1-18*01=IGHV1-18*04             | IGHJ6*03          | 20      | unmutated | CARVVVAATIEDYYYYGMDVW     | in-frame |
| cPB    | CLL#5      | average    | 29.2986 | IGHV1-46*01=IGHV1-46*03             | IGHJ6*03          | 20      | unmutated | CARDKGVGVNLNYYYYGMDVW     | in-frame |
| cPB    | CLL#5      | borderline | 22.0674 | IGHV1-2*02                          | IGHJ6*03          | 20      | unmutated | CARVGMGVAGTITYYYYGMDVW    | in-frame |
| cPB    | CLL#5      | borderline | 21.9354 | IGHV5-10-1*01=IGHV5-10-1*03         | IGHJ6*03          | 20      | unmutated | CARHNEGIAARPYYYYYGMDVW    | in-frame |
| cPB    | CLL#5      | borderline | 21.493  | IGHV1-69*05=IGHV1-69*13             | IGHJ6*03          | 20      | unmutated | CARDLRDGYNDYYYYYGMDVW     | in-frame |
| cPB    | CLL#5      | low        | 25.0688 | IGHV1-2*02                          | IGHJ6*03          | 20      | unmutated | CARASISPVDGGYYYYGMDVW     | in-frame |
| cPB    | CLL#5      | low        | 23.6375 | IGHV1-8*01=IGHV1-8*02               | IGHJ6*03          | 20      | unmutated | CARGMTVTLTMYYYYYGMDVW     | in-frame |
| cPB    | CLL#5      | average    | 27.7249 | IGHV1-18*01                         | IGHJ6*02          | 20      | unmutated | CARDTPPGVVPAAPYGGMDVW     | in-frame |
| cPB    | CLL#5      | average    | 31.9444 | IGHV1-18*01=IGHV1-18*04             | IGHJ6*02          | 20      | unmutated | CARVDIVVVAALYYYYGMDVW     | in-frame |
| cPB    | CLL#5      | borderline | 21.2668 | IGHV1-69*02=IGHV1-69*04=IGHV1-69*09 | IGHJ6*02          | 20      | unmutated | CARDPLTVAATNYYYYGMDVW     | in-frame |
| cPB    | CLL#5      | borderline | 22.5637 | IGHV1-69*01=IGHV1-69*12=IGHV1-69*13 | IGHJ6*02          | 20      | unmutated | CARGQGRGMFRSHYYYYGMDVW    | in-frame |
| cPB    | CLL#5      | borderline | 21.0238 | IGHV5-51*01                         | IGHJ6*02          | 20      | unmutated | CARQGITMVGANYYYYGMDVW     | in-frame |
| cPB    | CLL#5      | borderline | 22.5168 | IGHV1-69*01=IGHV1-69*12=IGHV1-69*13 | IGHJ6*03          | 20      | unmutated | CARDGGTISYPNYYYYGMDVW     | in-frame |
| cPB    | CLL#5      | borderline | 21.0149 | IGHV1-69*01=IGHV1-69*12=IGHV1-69*13 | IGHJ6*01          | 20      | unmutated | CARALNTAMVSPYYYYGMDVW     | in-frame |
| cPB    | CLL#5      | high       | 37.2933 | IGHV5-10-1*01=IGHV5-10-1*03         | IGHJ6*03          | 20      | unmutated | CARRAIFGVVNSYYYYGMDVW     | in-frame |
| aPB    | CLL#5      | average    | 30.7116 | IGHV1-2*02                          | IGHJ6*03          | 20      | unmutated | CARDRVTMVAQNYYYYYGMDVW    | in-frame |
| aPB    | CLL#5      | average    | 27.5136 | IGHV1-69*02=IGHV1-69*04=IGHV1-69*09 | IGHJ6*02          | 20      | unmutated | CARESEAVVPAAMYYYYGMDVW    | in-frame |
| aPB    | CLL#5      | average    | 28.5702 | IGHV1-69*13                         | IGHJ6*02          | 20      | unmutated | CAREDLFMVGNYYYYGMDVW      | in-frame |
| aPB    | CLL#5      | average    | 26.7655 | IGHV1-46*01=IGHV1-46*03             | IGHJ6*02          | 20      | unmutated | CARDLIVVVAATYYYYGMDVW     | in-frame |
| aPB    | CLL#5      | average    | 26.6604 | IGHV1-8*01=IGHV1-8*02               | IGHJ6*02          | 20      | unmutated | CARGDIVVVAAGHYYYYGMDVW    | in-frame |
| aPB    | CLL#5      | borderline | 22.9105 | IGHV1-2*05                          | IGHJ6*02          | 20      | unmutated | CARGGITGTITGTYHYGMDVW     | in-frame |
| aPB    | CLL#5      | borderline | 21.5591 | IGHV1-8*01                          | IGHJ6*02          | 20      | unmutated | CARGGIVGATVDYHYGMDVW      | in-frame |
| aPB    | CLL#5      | low        | 24.7688 | IGHV1-8*01=IGHV1-8*02               | IGHJ6*02          | 20      | unmutated | CARGPSSGTVTTFDYHYGMDVW    | in-frame |
| aPB    | CLL#5      | low        | 24.9821 | IGHV5-10-1*01=IGHV5-10-1*03         | IGHJ6*02          | 20      | unmutated | CARHEEVPVAGTVYYYYGMDVW    | in-frame |
| FL     | CLL#28A    | average    | 48.0086 | IGHV7-4-1*02                        | IGHJ6*02          | 17      | unmutated | <b>CASEGSGSYYYYYGMDVW</b> | in-frame |
| FL     | CLL#28A    | average    | 45.6756 | IGHV1-24*01                         | IGHJ6*02          | 17      | unmutated | <b>CASEGSGSYYYYYGMDVW</b> | in-frame |
| FL     | CLL#28A    | high       | 55.646  | IGHV1-2*02                          | IGHJ6*02          | 17      | unmutated | CARDYSGSYYYYYGMDVW        | in-frame |
| FBM    | CLL#28A    | average    | 46.8734 | IGHV1-2*02                          | IGHJ6*02          | 17      | unmutated | CARDTSSSYYYYYGMDVW        | in-frame |
| FBM    | CLL#28A    | high       | 50.2292 | IGHV1-2*02                          | IGHJ6*02          | 17      | unmutated | CARAYSSSFYHYGMDVW         | in-frame |
| cPB    | CLL#28A    | average    | 45.7733 | IGHV1-2*02                          | IGHJ6*03          | 17      | unmutated | CARGASGSYYYYGMDVW         | in-frame |
| FL     | CLL#1      | average    | 22.3217 | IGHV1-18*01                         | IGHJ4*02          | 13      | unmutated | CARAQALGIRPLDYW           | in-frame |
| FL     | CLL#1      | low        | 13.4818 | IGHV1-2*03                          | IGHJ4*02          | 13      | unmutated | CARDGRVLNPFYDYW           | in-frame |
| FL     | CLL#1      | borderline | 8.671   | IGHV1-2*02                          | IGHJ4*02          | 13      | unmutated | CARVSLTEGFYDYW            | in-frame |
| FL     | CLL#1      | average    | 28.1086 | IGHV1-2*02                          | IGHJ1*01          | 13      | unmutated | CASEQWLVPQYFQHW           | in-frame |
| FL     | CLL#1      | borderline | 7.8789  | IGHV1-2*02                          | IGHJ4*01          | 13      | unmutated | CAREKGLGTYPLTTW           | in-frame |
| FL     | CLL#1      | borderline | 7.8832  | IGHV1-2*02                          | IGHJ4*02          | 13      | unmutated | CARPLGVPPYFYDYW           | in-frame |
| FL     | CLL#1      | average    | 17.2339 | IGHV1-8*02                          | IGHJ4*02          | 13      | unmutated | CARAQALGIRPLDYW           | in-frame |
| FL     | CLL#1      | borderline | 8.3402  | IGHV1-2*02                          | IGHJ4*02          | 13      | unmutated | CARVPRPLGPFYDYW           | in-frame |
| FBM    | CLL#1      | average    | 24.2051 | IGHV1-2*02                          | IGHJ4*02          | 13      | unmutated | CAIPQQLVPETFDYW           | in-frame |
| FBM    | CLL#1      | borderline | 7.3298  | IGHV1-2*02                          | IGHJ2*01          | 13      | unmutated | CAREARLV**YFDLW           | in-frame |
| FBM    | CLL#1      | borderline | 6.6296  | IGHV1-46*01=IGHV1-46*02=IGHV1-46*03 | IGHJ4*02          | 13      | unmutated | CARVORGVLHYFGYW           | in-frame |
| FBM    | CLL#1      | borderline | 7.5937  | IGHV1-2*04                          | IGHJ4*02          | 13      | unmutated | CARAQATVAGQYDYW           | in-frame |
| FBM    | CLL#1      | low        | 13.2084 | IGHV1-8*01=IGHV1-8*02               | IGHJ4*02          | 13      | unmutated | CARELNFRETFDYW            | in-frame |
| FBM    | CLL#1      | low        | 11.6549 | IGHV5-51*01                         | IGHJ4*02          | 13      | unmutated | CARLSILGMPYFYDYW          | in-frame |
| FBM    | CLL#1      | low        | 12.9754 | IGHV1-8*01=IGHV1-8*02               | IGHJ4*02          | 13      | unmutated | CARNLILGIRHFDYW           | in-frame |
| cPB    | CLL#1      | average    | 19.1373 | IGHV1-46*01=IGHV1-46*02=IGHV1-46*03 | IGHJ4*02          | 13      | unmutated | CARDGLWVNGSDYW            | in-frame |
| cPB    | CLL#1      | borderline | 6.4035  | IGHV1-3*01                          | IGHJ4*02          | 13      | unmutated | CARAGLLEQLFDYW            | in-frame |
| cPB    | CLL#1      | low        | 12.7636 | IGHV1-8*01=IGHV1-8*02               | IGHJ4*02          | 13      | unmutated | CARGQIYAVAGNFDYW          | in-frame |
| cPB    | CLL#1      | low        | 11.7876 | IGHV1-18*01=IGHV1-18*04             | IGHJ1*01          | 13      | unmutated | CARRQQQLPAEYFQHW          | in-frame |
| cPB    | CLL#1      | low        | 10.7205 | IGHV1-18*01=IGHV1-18*04             | IGHJ4*02          | 13      | unmutated | CARGHQWELPFYDYW           | in-frame |
| cPB    | CLL#1      | average    | 17.6761 | IGHV5-10-1*01=IGHV5-10-1*03         | IGHJ4*02          | 13      | unmutated | <b>CARRGAMVPRSFYDYW</b>   | in-frame |
| cPB    | CLL#1      | borderline | 6.4664  | IGHV5-51*01                         | IGHJ4*02          | 13      | unmutated | <b>CARRGAMVPRSFYDYW</b>   | in-frame |
| cPB    | CLL#1      | borderline | 5.5759  | IGHV1-2*02                          | IGHJ4*02          | 13      | unmutated | CARGHWVVTVPDYW            | in-frame |
| cPB    | CLL#1      | borderline | 6.6186  | IGHV1-8*01=IGHV1-8*02               | IGHJ4*02          | 13      | unmutated | CARRNQWLVRNFDYW           | in-frame |
| cPB    | CLL#1      | average    | 14.4517 | IGHV1-3*01                          | IGHJ4*02          | 13      | unmutated | CARSEWELLFFDYW            | in-frame |
| cPB    | CLL#1      | average    | 18.0163 | IGHV1-3*01                          | IGHJ4*02          | 13      | unmutated | CARGSELGVRFYDYW           | in-frame |
| cPB    | CLL#1      | average    | 17.9589 | IGHV1-18*01                         | IGHJ4*02          | 13      | unmutated | CARGGHWVAFPDYW            | in-frame |
| cPB    | CLL#1      | borderline | 8.3642  | IGHV1-3*01                          | IGHJ4*02          | 13      | unmutated | CARAEIWAIVFYDYW           | in-frame |
| cPB    | CLL#1      | borderline | 6.7906  | IGHV1-18*01=IGHV1-18*04             | IGHJ4*02          | 13      | unmutated | CARDRWLFESHIDYW           | in-frame |
| cPB    | CLL#1      | borderline | 6.4606  | IGHV1-3*01                          | IGHJ4*02          | 13      | unmutated | CARDQEVVAAPPDYW           | in-frame |
| cPB    | CLL#1      | high       | 39.3958 | IGHV1-46*01=IGHV1-46*03             | IGHJ4*02          | 13      | unmutated | CARGQLVDSYFYDYW           | in-frame |
| cPB    | CLL#1      | low        | 11.1913 | IGHV1-3*01                          | IGHJ4*02          | 13      | unmutated | CARVSVVVAYFYDYW           | in-frame |
| cPB    | CLL#1      | low        | 10.7715 | IGHV1-18*01=IGHV1-18*04             | IGHJ4*02          | 13      | unmutated | CAREQVAATSLDYW            | in-frame |
| cPB    | CLL#1      | low        | 10.3091 | IGHV1-18*01                         | IGHJ4*02          | 13      | unmutated | CARESRRVQGNFDYW           | in-frame |
| cPB    | CLL#1      | low        | 10.4006 | IGHV1-18*01=IGHV1-18*04             | IGHJ4*02          | 13      | unmutated | CARDQAVAGTSLDYW           | in-frame |
| cPB    | CLL#1      | low        | 9.4747  | IGHV1-2*02                          | IGHJ4*02          | 13      | unmutated | CAREQDNGPYPYDYW           | in-frame |
| aPB    | CLL#1      | average    | 27.7989 | IGHV1-3*01                          | IGHJ4*02=IGHJ5*02 | 13      | unmutated | CARTQNLVTGTVENW           | in-frame |
| aPB    | CLL#1      | average    | 28.662  | IGHV1-8*01=IGHV1-8*02               | IGHJ4*02          | 13      | unmutated | CARGQQLVGSFSDYW           | in-frame |
| aPB    | CLL#1      | average    | 19.69   | IGHV1-18*01                         | IGHJ4*02          | 13      | unmutated | CARSMQLVPSFYDYW           | in-frame |
| aPB    | CLL#1      | borderline | 7.0919  | IGHV1-3*01                          | IGHJ4*02          | 13      | unmutated | CAREGAVGATWFDYW           | in-frame |
| aPB    | CLL#1      | high       | 35.9479 | IGHV1-3*01                          | IGHJ4*02=IGHJ5*02 | 13      | unmutated | CARTQNLVTGTVENW           | in-frame |
| aPB    | CLL#1      | high       | 35.6416 | IGHV1-3*01                          | IGHJ4*02          | 13      | unmutated | CARTQNLVTGTVENW           | in-frame |
| aPB    | CLL#1      | high       | 29.7688 | IGHV1-3*01                          | IGHJ4*02          | 13      | unmutated | CARGQWELLPFDYW            | in-frame |

Sequences in bold demonstrate convergent recombinations
